# Supplementary material for: Synthesis and photooxidation of oligodeoxynucleotides containing 5-dimethylaminocytosine as an efficient hole-trapping site in the positive-charge transfer through DNA duplexes
Source: Royal Society of Chemistry journal article supplement (doi:10.1039/c2ob06642d), 2011-12-12
Supplement: c2ob06642d.pdf [file c2ob06642d.pdf]

*Electronic Supplementary Information*

*for*

**Synthesis and Photooxidation of Oligodeoxynucleotides Containing  
5-Dimethylaminocytosine that Functions as an Efficient Hole-Trapping Site  
in the Positive-Charge Transfer through DNA Duplex**

*Hisatsugu Yamada, \*<sup>a</sup> Masayuki Kurata,<sup>b</sup> Kazuhito Tanabe,<sup>b</sup> Takeo Ito,<sup>b</sup> and Sei-ichi Nishimoto \*<sup>b</sup>*

*<sup>a</sup> Advanced Biomedical Engineering Research Unit, Kyoto University, Katsura, Kyoto 615-8510,  
Japan*

*<sup>b</sup> Department of Energy and Hydrocarbon Chemistry, Graduate School of Engineering, Kyoto  
University, Katsura, Kyoto 615-8510, Japan*

\*To whom correspondence should be addressed

E-mail: hisatsugu@t03.mbox.media.kyoto-u.ac.jp (H.Y) or nishimot@scl.kyoto-u.ac.jp (S. N)

## 1. Synthesis

### 5-Dimethylamino-2'-deoxycytidine (d<sup>DMA</sup>C).

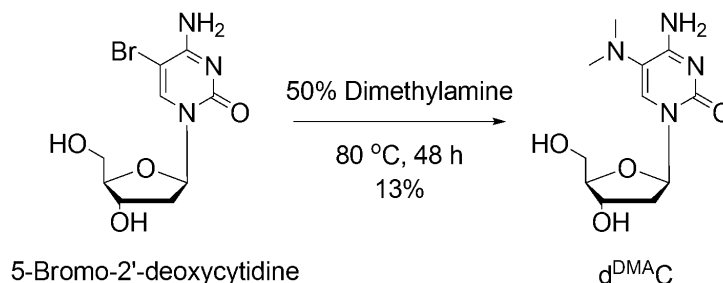

A solution of 5-bromo-2'-deoxycytidine (200 mg, 0.65 mmol) in 3 mL of 50% aqueous dimethylamine was sealed in 3 mL vial and heated at 80 °C for 40 hours. The residue was evaporated under reduced pressure and purified by reversed phase HPLC (elution with 5% acetonitrile/water, 3.0 mL/min) to give d<sup>DMA</sup>C (23 mg, 13%) as a white solid: mp 224-231 °C; <sup>1</sup>H NMR (D<sub>2</sub>O, 300 MHz)  $\delta$  7.62 (s, 1H), 6.14 (t, 1H,  $J$  = 6.4 Hz), 4.34 (dd, 1H,  $J$  = 4.6, 10.8 Hz), 3.92 (t, 1H,  $J$  = 4.0), 3.73 (dd, H,  $J$  = 3.2, 15.6), 3.64 (dd, 1H,  $J$  = 4.2, 12.6), 2.45 (s, 6H), 2.30 (1H), 2.19 (1H); <sup>13</sup>C NMR (D<sub>2</sub>O, 400 MHz)  $\delta$  163.7, 156.7, 131.2, 124.8, 87.2, 86.9, 70.7, 61.3, 43.9, 40.2; FABMS  $m/z$  271 [(M+H)<sup>+</sup>]; HRMS calcd. for C<sub>11</sub>H<sub>19</sub>N<sub>4</sub>O<sub>4</sub> 271.1206, found 271.1414.

## 2. Stern–Volmer analysis of the fluorescence quenching

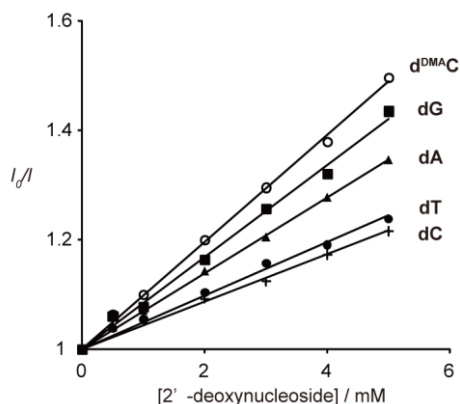

**Fig. S1.** Stern–Volmer plots for the fluorescence quenching of <sup>1</sup>DCA\* by dC (cross), dT (closed circle), dA (triangle), dG (square), or d<sup>DMAc</sup> (open circle). Relative intensity of the fluorescence emission of 25  $\mu\text{M}$  DCA at 487 nm was measured with varying concentrations of 2'-deoxyribonucleoside quenchers in deoxygenated solution of 10 mM phosphate buffer (pH 7.0).

## 3. PAGE analysis

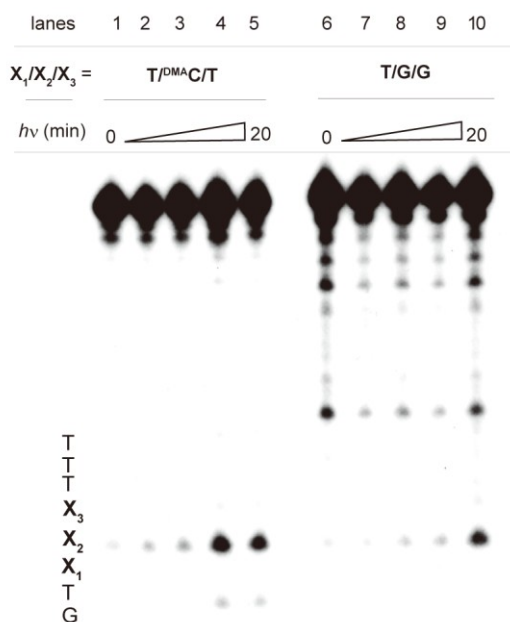

**Fig. S2.** PAGE image of photoirradiated ODN2( $X_1/X_2/X_3$ )/AQ-ODN2( $Y_1/Y_2/Y_3$ ) [ $X_1/X_2/X_3 = \text{T/DMAc/T}$ ,  $Y_1/Y_2/Y_3 = \text{A/G/A}$  (lanes 1–5) and  $X_1/X_2/X_3 = \text{T/G/G}$ ,  $Y_1/Y_2/Y_3 = \text{C/C/A}$  (lanes 6–10)]. ODN duplexes in 10 mM sodium cacodylate buffer (pH 7.0) containing 100 mM NaCl were photoirradiated (365 nm, 0–20 min) at 20 °C, followed by piperidine treatment (90 °C, 20 min).

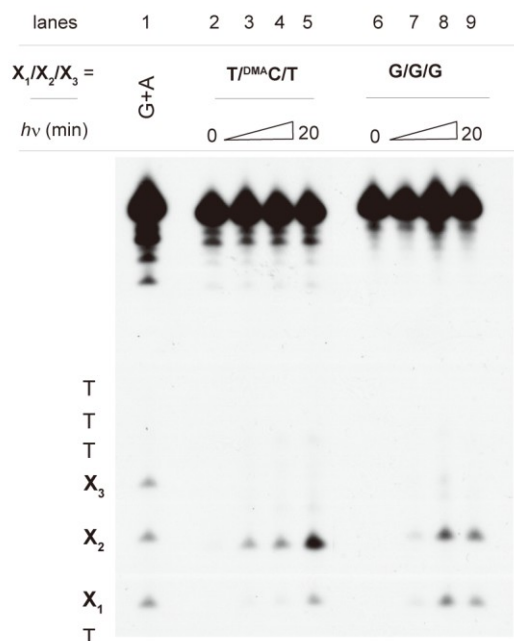

**Fig. S3.** PAGE image of photoirradiated ODN2( $X_1/X_2/X_3$ )/AQ-ODN2( $Y_1/Y_2/Y_3$ ) [ $X_1/X_2/X_3 = T/DMA C/T$ ,  $Y_1/Y_2/Y_3 = A/G/A$  (lanes 2–5) and  $X_1/X_2/X_3 = G/G/G$ ,  $Y_1/Y_2/Y_3 = C/C/C$  (lanes 6–9)]. G+A indicates Maxam–Gilbert sequencing lane (lane 1). ODN duplexes in 10 mM sodium cacodylate buffer (pH 7.0) containing 100 mM NaCl were photoirradiated (365 nm, 0–20 min) at 20 °C, followed by piperidine treatment (90 °C, 20 min).

#### 4. ESI-TOF mass analysis

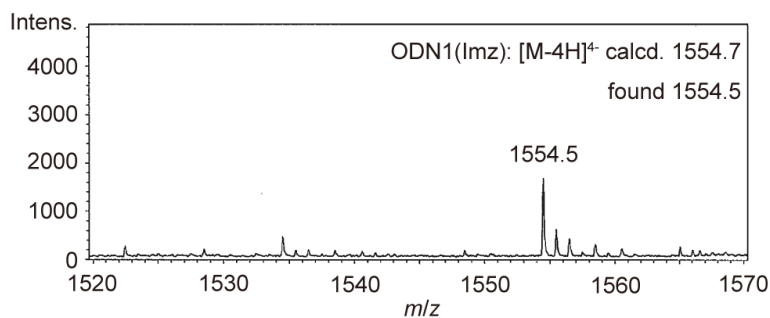

**Fig. S4.** ESI–TOF mass (negative mode) profiles of the photoirradiated ODN1( $^{DMA}C$ )/AQ-ODN1(G). The duplex (10  $\mu$ M) in 5 mM sodium cacodylate buffer (pH 7.0) was photoirradiated (365 nm, 20 min) at 20 °C. The reaction mixture was subjected to ESI-TOF mass analysis.
